# Supplementary material for: Impact of synthesis methods on the functionality of antibody-conjugated gold nanoparticles for targeted therapy
Source: Royal Society of Chemistry journal article supplement (doi:10.1039/d4na00134f), 2024-01-01
Supplement: d4na00134f1.pdf [file d4na00134f1.pdf]

## Supplementary Information

### Impact of Synthesis Methods on the Functionality of Antibody-Conjugated Gold Nanoparticles for Targeted Therapy

Adi Anaki, Chen Tzror-Azankot, Menachem Motiei, Tamar Sadan, Rachela Popovtzer\*

Faculty of Engineering and the Institute of Nanotechnology and Advanced Materials, Bar-Ilan University,  
Ramat Gan 5290002, Israel

\*Corresponding Author

Email: [rachela.popovtzer@biu.ac.il](mailto:rachela.popovtzer@biu.ac.il)

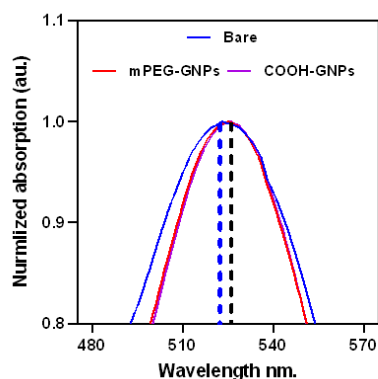

**Figure S1: PEGylated-GNPs UV-visible spectrum.** UV-visible spectrum of GNPs before coating (‘bare GNPs’), and after coating with mPEG (‘mPEG-GNPs’) or PEG-COOH (‘COOH-GNPs’). The UV-vis spectrum shifted after coating with the different PEG types, confirming successful coating.

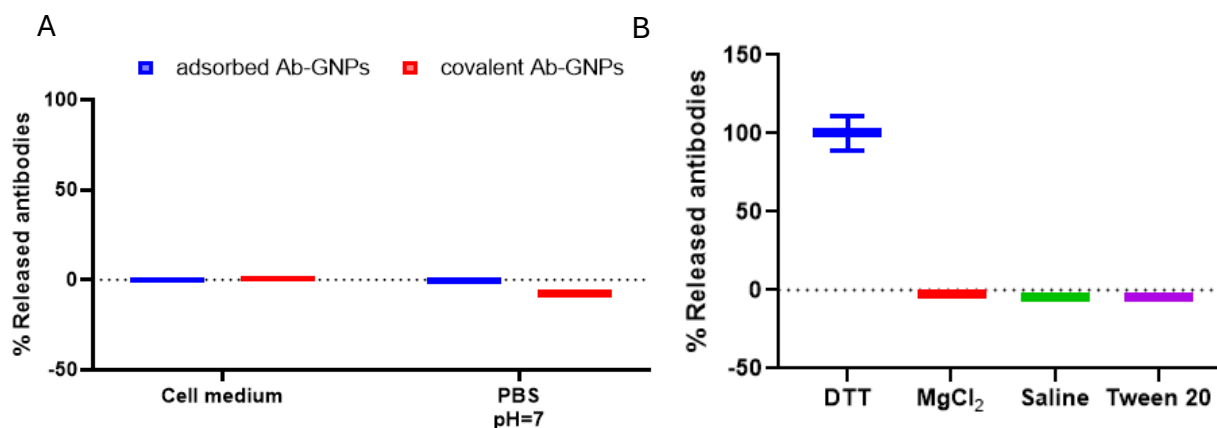

**Figure S2: Stability of Ab-GNPs and confirmation of covalent binding.** (A) Adsorbed Ab-GNPs or covalently bound Ab-GNPs incubated with PBS or cell culture medium (DMEM supplemented with 10% fetal bovine serum). Results are normalized to the absorbance of PEGylated-GNPs w/o antibodies. Negligible (0-1%) release of antibodies was seen from either adsorbed or covalently bound Ab-GNPs after 24 hrs of incubation with PBS or cell medium, indicating their stability. (B) Covalently-bound Ab-GNPs (100% PEG-COOH coating, 1 mg initial antibody mass) were incubated for 24h with different solutions that disrupt non-covalent bonds: Saline, Tween 20, and MgCl<sub>2</sub>. The particles were also incubated with DTT, that breaks covalent bonds. Antibody release did not occur following incubation with saline, Tween 20, or MgCl<sub>2</sub>, while incubation with DTT led to high release of antibodies from the GNPs. This indicates an effective process of covalent binding of the antibodies to the GNPs.

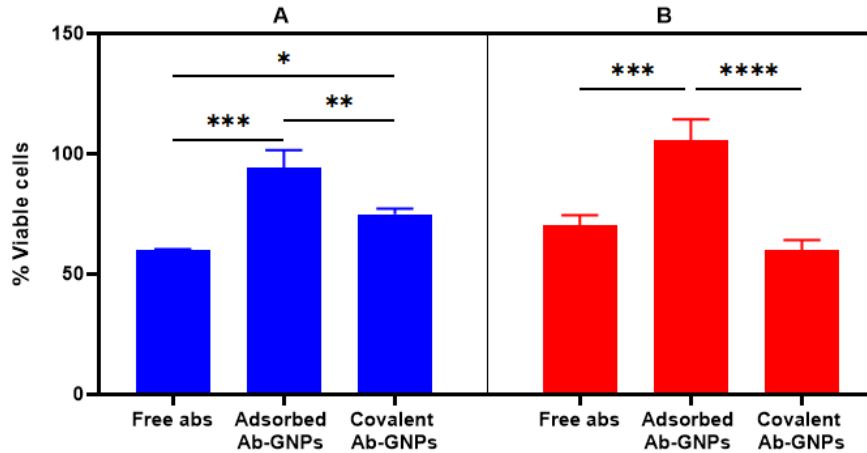

**Figure S3: Equivalent effect of covalent Ab-GNPs and free antibodies on cell viability.** (A) %Viable cells after treatment (72 hrs, 37°C) with free cetuximab, adsorbed Ab-GNPs, or covalent Ab-GNPs; for each group, antibodies (free/bound) at a concentration of 180 nM (both Ab-GNP types synthesized with 10 mg initial antibody mass). (B) %Viable cells after treatment (72 hrs, 37°C) with free antibody, adsorbed Ab-GNPs or covalent Ab-GNPs; for each group, antibodies (free/bound) at a concentration of 320 nM (both Ab-GNP types synthesized with 20 mg initial antibody mass). \* $p < 0.05$ , \*\* $p < 0.01$ , \*\*\* $p < 0.001$ , one way ANOVA.

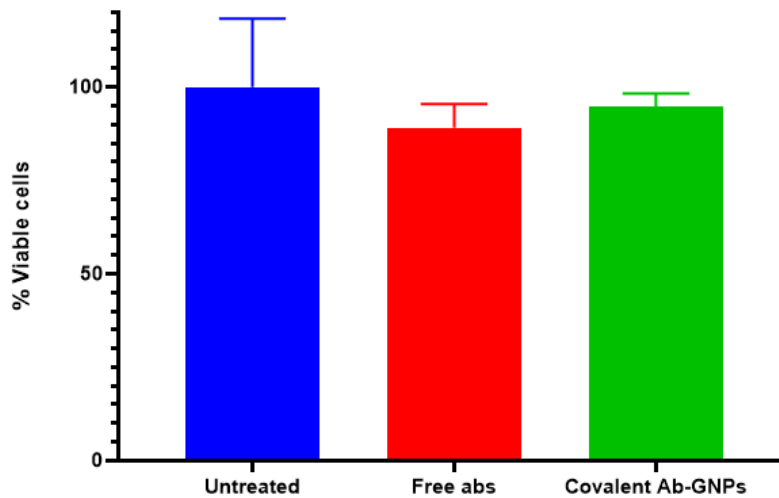

**Figure S4: 3T3 fibroblast cell viability after treatment with Ab-GNPs.** 3T3 cells were incubated (72 hrs, 37°C) with either PEG-COOH coated Ab-GNPs (320 nM bound antibodies; 20 mg initial antibody mass) or free antibodies (320 nM). Both treatments had no significant effect on the viability of 3T3 cells as compared to untreated cells.
